# Supplementary material for: Maternal exposure to polystyrene nanoplastics impacts developmental milestones and brain structure in mouse offspring
Source: Royal Society of Chemistry journal article supplement (doi:10.1039/d2va00227b), 2023-01-01
Supplement: d2va00227b3.pdf [file d2va00227b3.pdf]

### Supporting Information:

**Fig. S1** While there was a significant difference in postnatal growth trajectory between (A) females and (B) males ( $p < 0.0001$ ), there was no difference between mice exposed to polystyrene nanoplastics (PS-NPs, red) and controls (black) ( $p = 0.8$ ).  $n = 10$  litters/group. Data are shown as means and 95% confidence intervals.

**Fig. S2** There was no difference between (A) females and (B) males ( $p = 0.7$ ) or between mice exposed to polystyrene nanoplastics (PS-NPs, red) and controls (black) ( $p = 0.2$ ) in the time it took for pups to right themselves across postnatal days 2 to 6.  $n = 10$  litters/group. Data are shown as means and 95% confidence intervals.
