# Supplementary figures and images for: Maternal exposure to polystyrene nanoplastics impacts developmental milestones and brain structure in mouse offspring
Source: Royal Society of Chemistry journal article supplement (doi:10.1039/d2va00227b), 2023-01-01

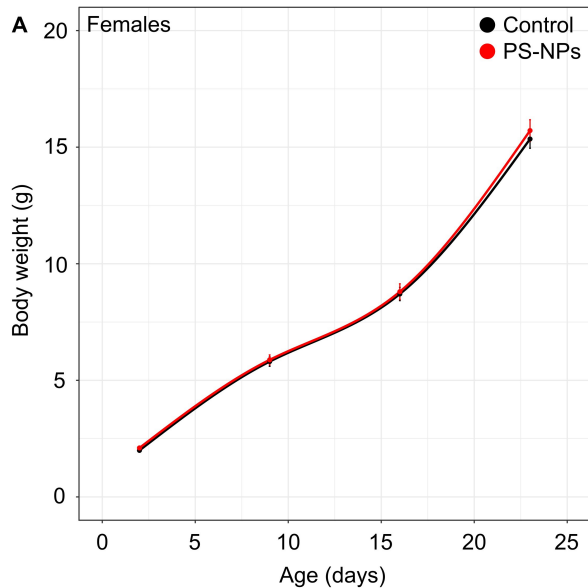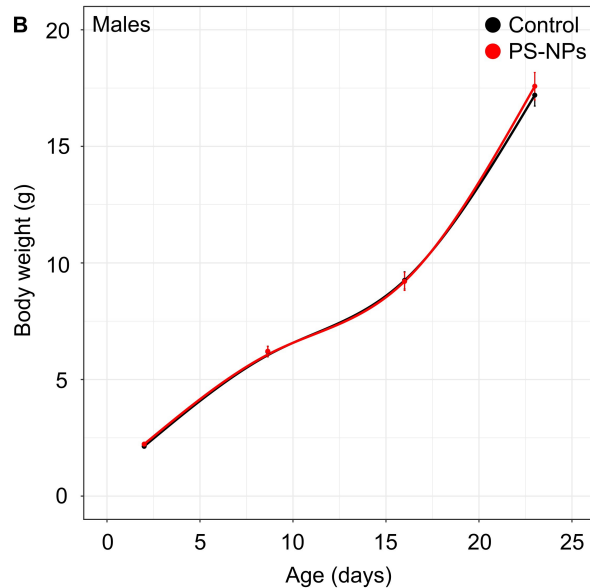

Supplement: d2va00227b1.pdf [file d2va00227b1.pdf]

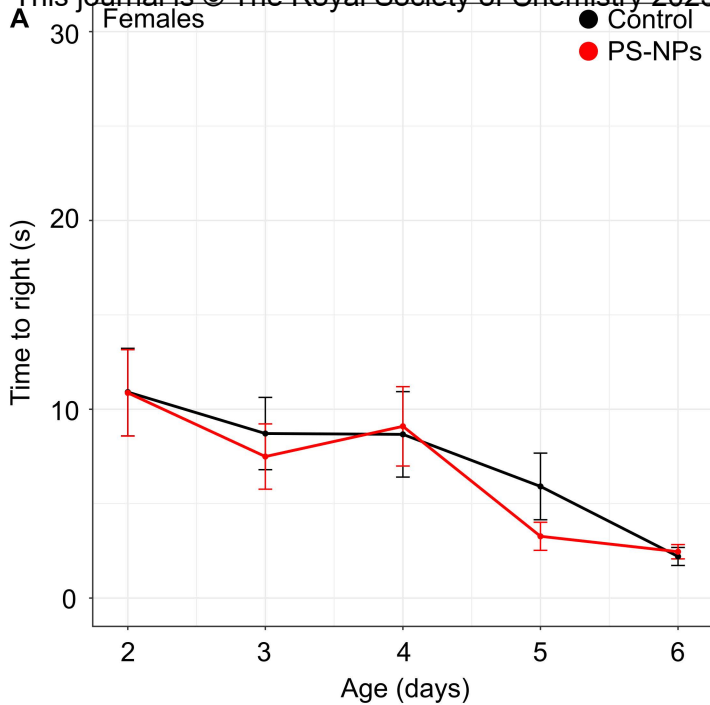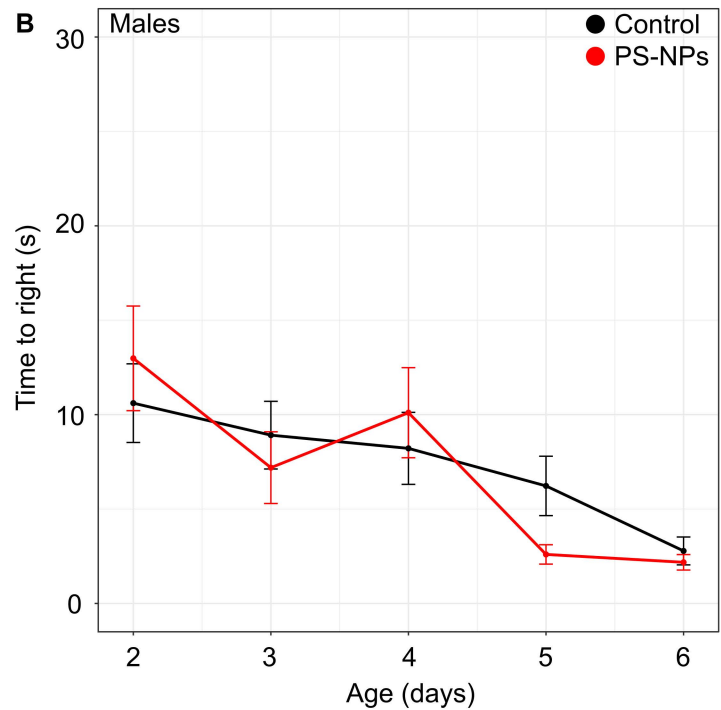

Supplement: d2va00227b2.pdf [file d2va00227b2.pdf]
